# Supplementary material for: Cationic polymerization of isoprene initiated by 2-cyclohexylidene ethanol–B(C6F5)3: an insight into initiation and branching reactions
Source: Royal Society of Chemistry journal article supplement (doi:10.1039/c2py20572f), 2012-09-08
Supplement: c2py20572f.pdf [file c2py20572f.pdf]

*Electronic Supplementary Information*

**Cationic Polymerization of Isoprene initiated by 2-cyclohexylidene ethanol/ $B(C_6F_5)_3$ : insight into initiation and branching reactions**

Samira Ouardad, Thomas Lebarbé, Alain Deffieux, Frédéric Peruch

Laboratoire de Chimie des Polymères Organiques, UMR 5629 CNRS/UB1/IPB, Bordeaux

University, 16 avenue Pey Berland, 33607 Pessac Cedex, France

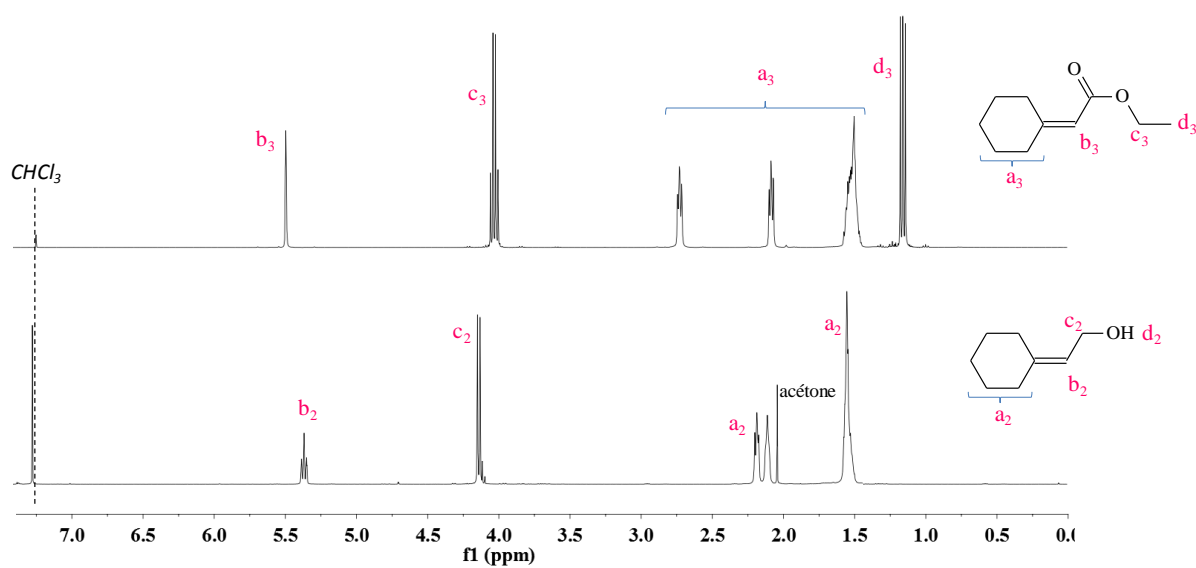

**Figure S1.**  $^1\text{H}$  NMR spectra of ethylcyclohexylidene acetate and 2-cyclohexylidene ethanol.

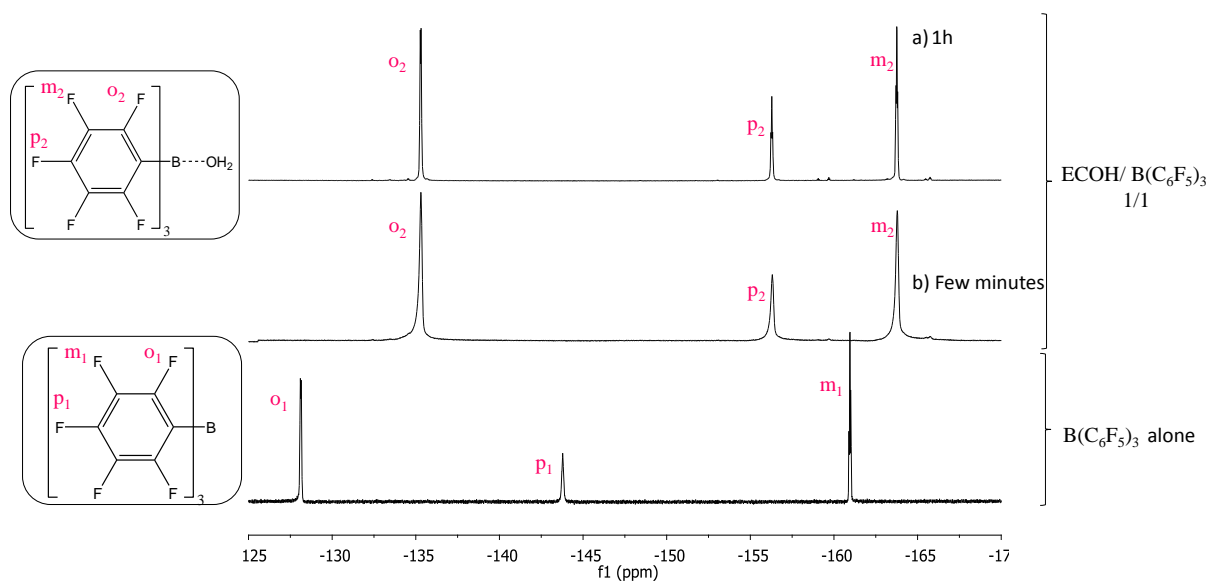

**Figure S2.**  $^{19}\text{F}$  NMR spectra measured at different time for the ionization study of ECOH by  $\text{B}(\text{C}_6\text{F}_5)_3$  (1/1) in  $\text{CD}_2\text{Cl}_2$ .

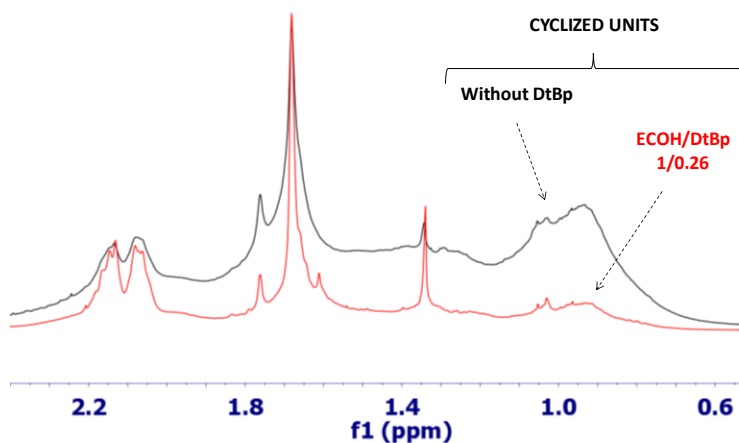

**Figure S3.**  $^1\text{H}$  NMR spectra (0-2 ppm region) of oligoisoprenes obtained without and with  $d^t\text{BP}$ .

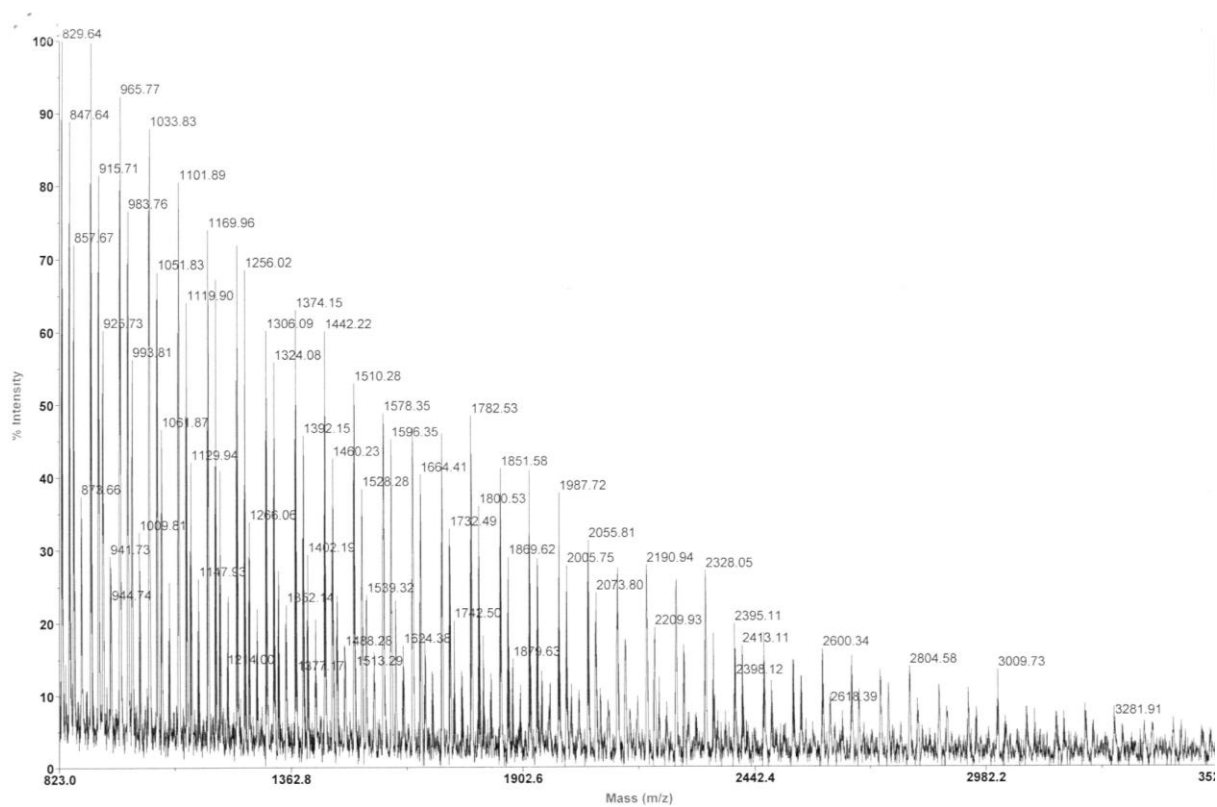

**Figure S4.** Maldi-ToF spectrum of run 1 in Table 3

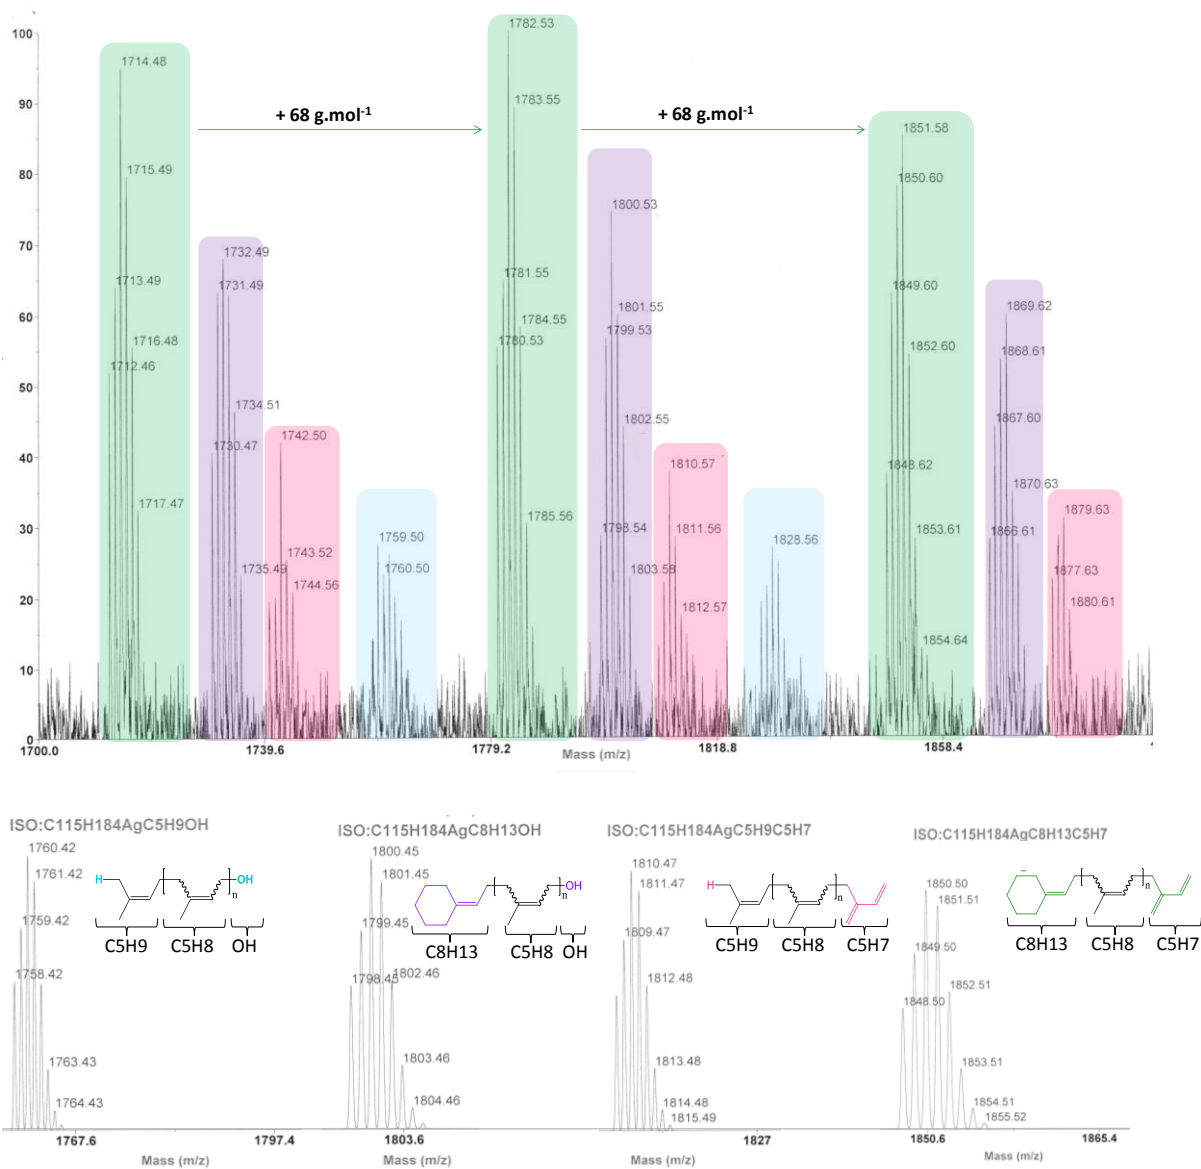

**Figure S5.** Simulations of Maldi-Tof spectrum compared to experimental results for polyisoprene chains bearing different chain-ends.

| n  | nC <sub>5</sub> H <sub>8</sub> AgC <sub>8</sub> H <sub>13</sub> C <sub>8</sub> H <sub>13</sub> C <sub>5</sub> H <sub>7</sub> C <sub>5</sub> H <sub>7</sub> | nC <sub>5</sub> H <sub>8</sub> AgC <sub>8</sub> H <sub>13</sub> C <sub>8</sub> H <sub>13</sub> C <sub>5</sub> H <sub>7</sub> OH | nC <sub>5</sub> H <sub>8</sub> gC <sub>8</sub> H <sub>13</sub> C <sub>8</sub> H <sub>13</sub> OH |
|----|------------------------------------------------------------------------------------------------------------------------------------------------------------|---------------------------------------------------------------------------------------------------------------------------------|--------------------------------------------------------------------------------------------------|
| 19 | 1752,27                                                                                                                                                    | 1702,22                                                                                                                         | 1652,17                                                                                          |
| 20 | 1820,27                                                                                                                                                    | 1770,22                                                                                                                         | 1720,17                                                                                          |
| 21 | 1888,28                                                                                                                                                    | 1838,23                                                                                                                         | 1788,17                                                                                          |
| 22 | 1956,28                                                                                                                                                    | 1906,23                                                                                                                         | 1856,18                                                                                          |
| 23 | 2024,28                                                                                                                                                    | 1974,23                                                                                                                         | 1924,18                                                                                          |
| 24 | 2092,29                                                                                                                                                    | 2042,24                                                                                                                         | 1992,18                                                                                          |
| 25 | 2160,29                                                                                                                                                    | 2110,24                                                                                                                         | 2060,19                                                                                          |
| 26 | 2228,30                                                                                                                                                    | 2178,24                                                                                                                         | 2128,19                                                                                          |

*Table S1. Theoretical Maldi-ToF molar masses of branched polyisoprenes obtained by intermolecular branching (chains bearing 2 cyclohexylene moieties), molar masses highlighted in grey are the expected ones for the zoom in Figure S5.*

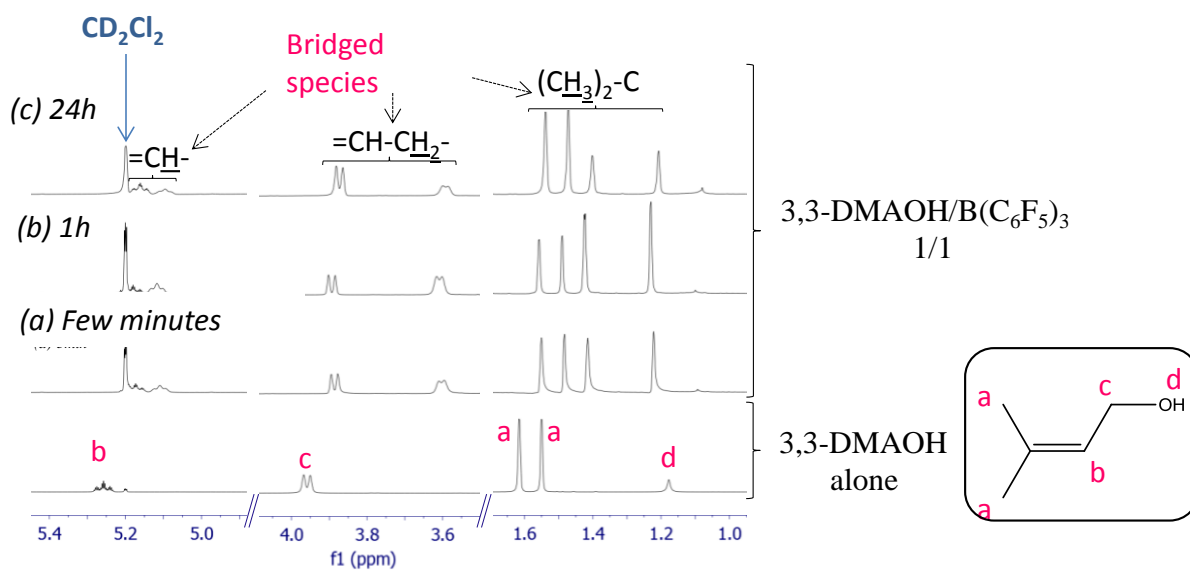

**Figure S6.** <sup>1</sup>H NMR spectra of 3,3-DMAOH/B(C<sub>6</sub>F<sub>5</sub>)<sub>3</sub> (1/1) system for different reaction time in CD<sub>2</sub>Cl<sub>2</sub> at – 40°C.
